# Supplementary material for: Effects of Combined Admistration of Imatinib and Sorafenib in a Murine Model of Liver Fibrosis
Source: PubMed Central journal article supplement (PMC7571085; doi:10.3390/molecules25184310), 2020-09-20
Supplement: molecules-25-04310-s001.pdf [file molecules-25-04310-s001.pdf]

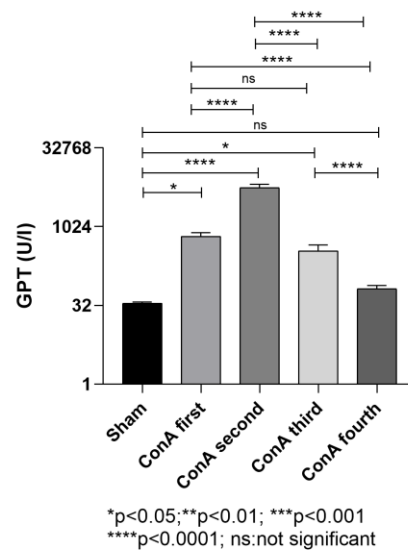

**Figure S1.** Serum ALT levels during the course of ConA challenge.
